# Supplementary material for: HACSim: an R package to estimate intraspecific sample sizes for genetic diversity assessment using haplotype accumulation curves
Source: PubMed Central journal article supplement (PMC7924493; doi:10.7717/peerj-cs.243), 2020-01-06
Supplement: peerj-cs-06-243-s004.pdf [file peerj-cs-06-243-s004.pdf]

Supplementary information to accompany  
**HACSim**: Iterative extrapolation of haplotype  
accumulation curves for assessment of intraspecific COI  
DNA barcode diversity estimates

## 1 Additional Algorithm Parameters

The user also has the ability to subsample data. The function arguments `subset.haps`, `subset.seqs = TRUE`, `prop.haps` and `prop.seqs` are in place to allow for this. A user simply inputs the proportion of haplotype labels (`prop.haps` in the case of hypothetical species) or DNA sequences (`prop.seqs` in the case of real species) to subsample from the entire dataset. Thus, if a species COI alignment comprises  $N = 100$  DNA barcode sequences and a subsample of 10% of the data is desired, then a random subset will contain  $N = 10$  sequence reads ( $100 \times 0.10$ ). The effect of subsetting data is that it results in haplotype frequencies being reweighted according to the number of haplotypes contained in the subsample. For instance, if a hypothetical species comprises five unique haplotypes, each with a frequency of 0.20 (20%), and a subsample of four haplotypes is desired (*i.e.*, a proportion of 80% via `prop.haps = 0.80`), then each remaining haplotype in the reduced dataset will have a frequency of 0.25 (25%). A random subsample of haplotypes can be regarded as having been sampled from a single subpopulation/deme in which individuals have migrated into from

neighbouring locations. While this bypasses the challenge of estimating the total number of demes in addition to per-generation migration rates, correlations among sampled populations separated by hundreds to thousands of kilometres will be evident. Hence, in utilizing a subsampling scheme, an important assumption is that all individuals within a given subpopulation are sampled, which may not be the case in reality. Alternatively, a subsampling scheme can be employed to limit the size of large sequence datasets to reduce computation overhead without sacrificing a reduction in the number of permutations (**perms**). Subsampled DNA sequences are automatically written to a FASTA file called 'seqs.fas'.

The function arguments **subsample** and **prop** are used to initialize **subset.haps**, **subset.seqs**, **prop.haps** and **prop.seqs** described previously. These latter four arguments are not used directly by the user. The argument **subsample** takes a binary logical argument of either **TRUE** or **FALSE**, whereas **prop** takes a numeric value between zero and one, exclusive.

**Table S1:** Algorithm parameters for subsampling haplotype labels or DNA sequences

| <b>Parameter</b> | <b>Definition</b>                        | <b>Range</b> |
|------------------|------------------------------------------|--------------|
| subset.haps      | random subset of species haplotypes      | $(1, H)$     |
| prop.haps        | proportion of haplotypes to subsample    | $(0, 1)$     |
| subset.seqs      | random subset of species DNA sequences   | TRUE, FALSE  |
| prop.seqs        | proportion of DNA sequences to subsample | $(0, 1)$     |
